# Supplementary material for: Alterations in Gut Microbiome Composition and Barrier Function Are Associated with Reproductive and Metabolic Defects in Women with Polycystic Ovary Syndrome (PCOS): A Pilot Study
Source: PubMed Central journal article supplement (PMC5207627; doi:10.1371/journal.pone.0168390), 2017-01-03
Supplement: pone.0168390.s005.pdf [file pone.0168390.s005.pdf]

# 1 **Supplementary Materials and Methods**

## 2 **Study cohort**

3 PCOS was diagnosed according to the Rotterdam Criteria, which require the presence of two out of  
4 three of the following symptoms: clinical/biochemical hyperandrogenism, oligo-/anovulation, and  
5 polycystic ovaries. Additionally, other disorders which may mimic the PCOS phenotype were  
6 excluded [1].

7 Clinical hyperandrogenism was assessed using the modified Ferriman-Gallwey (FG) Score, with a  
8 self-reported score of eight or higher indicating hirsutism [2]. Biochemical hyperandrogenism was  
9 defined according to the recommendations of the European Society of Human Reproduction and  
10 Embryology and the Androgen Excess Society based on serum values of total testosterone and  
11 dehydroepiandrosterone sulfate (DHEAS) [1,3]. For total testosterone, a cut-off of 2.1 nmol/l was  
12 used based on previously published data from a representative population sample [4]. As there is  
13 currently no reference range available for serum DHEAS assessed by mass spectrometry, a cut-off of  
14 7.5  $\mu$ mol/l was chosen based on the empirically determined reference range of the endocrine  
15 laboratory at the Department of Endocrinology and Diabetology, University Hospital Graz. As  
16 DHEAS is routinely measured by immunoassay, which typically overestimates concentrations due to  
17 cross-reactivity, this cut-off is considered conservative [5]. Oligo-/anovulation was defined as  
18 menstrual cycles with a duration  $>35$  days or the absence of menstruation for three or more  
19 consecutive months. Polycystic ovarian morphology, diagnosed by a gynecological ultrasound, was  
20 assessed based on medical history. Thyroid disorder, congenital adrenal hyperplasia, Cushing's  
21 syndrome, hyperprolactinemia, androgen-secreting tumors, and pregnancy were excluded by  
22 laboratory measurements of thyroid-stimulating hormone (TSH), 17-hydroxyprogesterone (17OH-P),  
23 cortisol, prolactin, pregnancy test, and clinical examination. Healthy controls did not meet any of the  
24 Rotterdam Criteria, with the following exceptions: isolated elevation of DHEAS or androstenedione  
25 (6 subjects) and long-standing hirsutism (1 subject), as these features are not considered pathological  
26 in the absence of reproductive or cosmetic symptoms of hyperandrogenism [1].

## 27 **Next-generation sequencing**

28 Total DNA was extracted from stool samples using the MagNA Pure LC DNA Isolation Kit III  
29 (Bacteria, Fungi) on the MagNA Pure Instrument (Roche, Rotkreuz, Switzerland). Stool was thawed  
30 partially and an amount approximately the size of a maize kernel was homogenized in 500  $\mu$ l 1x  
31 phosphate buffered saline (PBS). 250  $\mu$ l of the diluted sample was added to 250  $\mu$ l bacteria lysis  
32 buffer in a sample tube containing MagNA Lyser Green Beads (1.4 mm diameter ceramic beads,  
33 Roche). Samples were homogenized in a MagNA Lyser Instrument (2 x 6000 rpm for 30 s, separated  
34 by 1 min cooling), treated with 25  $\mu$ l lysozyme (Roth, Karlsruhe, Germany) at 37  $^{\circ}$ C for 30 minutes,  
35 and then with 43.3  $\mu$ l proteinase K (Roche) at 60  $^{\circ}$ C for 1 hour. Lysates were incubated at 95  $^{\circ}$ C for  
36 10 minutes, cooled on ice for 5 minutes, and centrifuged for 5 minutes at full speed. DNA was  
37 isolated from 100  $\mu$ l lysate supernatant by the MagNA Pure Instrument using the manufacturer's  
38 software and eluted in 100  $\mu$ l elution buffer. A PCR reaction was performed to amplify the V1-2  
39 region of the bacterial 16S rRNA gene using the primers F27 (AGAGTTTGATCCTGGCTCAG) and  
40 R357 (CTGCTGCCTYCCGTA) (Eurofins Genomics, Ebersberg, Germany) and the FastStart High  
41 Fidelity PCR System, dNTPack (Roche) with initial denaturation at 95  $^{\circ}$ C for 3 minutes followed by  
42 28 cycles of denaturation at 95  $^{\circ}$ C for 45 seconds, annealing at 55  $^{\circ}$ C for 45 seconds, and extension at  
43 72  $^{\circ}$ C for 1 minute, one cycle of final extension at 72  $^{\circ}$ C for 7 minutes, and a final cooling step to 10  
44  $^{\circ}$ C. Triplicates were pooled, checked on a 1.5 % agarose gel, and 15  $\mu$ l of pooled PCR product were  
45 normalized according to manufacturer's instructions on a SequalPrep Normalization Plate (Life  
46 Technologies, Vienna, Austria). 15  $\mu$ l of the normalized PCR product were used as a template for  
47 indexing PCR in a 50  $\mu$ l single reaction to introduce barcode sequences to each sample according to  
48 Kozich *et al.* [6]. Cycling conditions were initial denaturation at 95  $^{\circ}$ C for 3 minutes followed by 8  
49 cycles of denaturation at 95  $^{\circ}$ C for 45 seconds, annealing at 55  $^{\circ}$ C for 45 seconds, and extension at 72  
50  $^{\circ}$ C for 1 minute, one cycle of final extension at 72  $^{\circ}$ C for 7 minutes, and a final cooling step to 4  $^{\circ}$ C.  
51 After indexing, 5  $\mu$ l of each sample were pooled and 50  $\mu$ l of the unpurified library were loaded on a  
52 1 % agarose gel and purified from the gel with the Qiaquick Gel Extraction Kit (Qiagen, Hilden,  
53 Germany) according to the manufacturer's instructions. The pooled DNA was quantified using  
54 QuantiFluor ONE dsDNA dye on a Quantus Fluorometer (Promega, Mannheim, Germany) according

55 to the manufacturer's instructions and visualized for size validation on a 2100 Bioanalyzer Instrument  
56 (Agilent Technologies, Santa Clara, USA) using a high-sensitivity DNA assay according to the  
57 manufacturer's instructions. The final 6 pM library containing all pooled samples was run with 20 %  
58 PhiX and v3, 600 cycles chemistry according to the manufacturer's instructions on a MiSeq desktop  
59 sequencer (Illumina, Eindhoven, Netherlands).

## 60 **Sequencing data analysis**

61 Raw reads were processed using the open-source software mothur V1.35.0 according to the protocol  
62 by Kozich *et al.* (accessed April 2015), with the following adaptations: no maxlength was defined  
63 during the screening step, start (1,046) and end (6,426) positions were adapted to the V1-V2 region,  
64 and a difference of three bases was permitted during the precluster step (based on the recommendation  
65 by the authors to allow one mismatch per 100 bp) [6]. Chimeric sequences were identified by  
66 UCHIME and subsequently removed [7]. After removal of non-bacterial sequences, classified using  
67 the SILVA 119 database ([www.arb-silva.de](http://www.arb-silva.de)), the remaining sequences were degapped, deuniqued,  
68 split into individual samples, and formatted for use with the open-source software QIIME 1.8.0 [8].

## 69 **Statistical analysis**

70 The following variables contained missing values: AMH (2 control, 4 PCOS); LH, LH:FSH ratio,  
71 hsCRP (1 control, 1 PCOS each); HDL-cholesterol, polycystic ovarian morphology (1 PCOS each);  
72 DHT, DHEAS, free testosterone, free DHT, stool calprotectin, stool zonulin (1 control each).

73

## 74 **Supplementary References**

- 75 1. Rotterdam ESHRE/ASRM-Sponsored PCOS consensus Workshop Group. Revised 2003 consensus on  
76 diagnostic criteria and long-term health risks related to polycystic ovary syndrome (PCOS). *Hum*  
77 *Reprod.* 2004;19(1): 41–7.
- 78 2. Yildiz BO, Bolour S, Woods K, Moore A, Azziz R. Visually scoring hirsutism . *Hum Reprod Update.*

- 79 2010;16(1): 51–64.
- 80 3. Azziz R, Carmina E, Dewailly D, Diamanti-Kandarakis E, Escobar-Morreale HF, Futterweit W, et al.  
81 Criteria for Defining Polycystic Ovary Syndrome as a Predominantly Hyperandrogenic Syndrome: An  
82 Androgen Excess Society Guideline. *J Clin Endocrinol Metab.* 2006;91(11): 4237.
- 83 4. Haring R, Hannemann A, John U, Radke D, Nauck M, Wallaschofski H, et al. Age-specific reference  
84 ranges for serum testosterone and androstenedione concentrations in women measured by liquid  
85 chromatography-tandem mass spectrometry . *J Clin Endocrinol Metab.* 2012;97(2): 408–15.
- 86 5. Chadwick CA, Owen LJ, Keevil BG. Development of a method for the measurement of  
87 dehydroepiandrosterone sulphate by liquid chromatography-tandem mass spectrometry . *Ann Clin*  
88 *Biochem.* 2005;42(Pt 6): 468–74.
- 89 6. Kozich JJ, Westcott SL, Baxter NT, Highlander SK, Schloss PD. Development of a dual-index  
90 sequencing strategy and curation pipeline for analyzing amplicon sequence data on the MiSeq Illumina  
91 sequencing platform . *Appl Environ Microbiol.* 2013;79(17): 5112–20.
- 92 7. Edgar RC, Haas BJ, Clemente JC, Quince C, Knight R. UCHIME improves sensitivity and speed of  
93 chimera detection . *Bioinformatics.* 2011;27(16): 2194–200.
- 94 8. Caporaso JG, Kuczynski J, Stombaugh J, Bittinger K, Bushman FD, Costello EK, et al. QIIME allows  
95 analysis of high-throughput community sequencing data . *Nat Methods.* 2010;7(5): 335–6.
- 97
