# Supplementary material for: Alterations in Gut Microbiome Composition and Barrier Function Are Associated with Reproductive and Metabolic Defects in Women with Polycystic Ovary Syndrome (PCOS): A Pilot Study
Source: PLoS One. 2017 Jan 3;12(1):e0168390. doi: 10.1371/journal.pone.0168390 (PMC5207627; doi:10.1371/journal.pone.0168390)
Supplement: S2 File — (PDF) [file pone.0168390.s006.pdf]

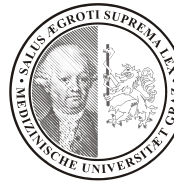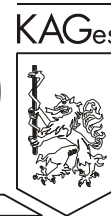

# Ernährungsfragebogen

StudienID

PatientenID

Datum:

| Wie häufig verzehren Sie folgende Lebensmittel und Getränke?                          |                  |         |                    |                    |                    |              |
|---------------------------------------------------------------------------------------|------------------|---------|--------------------|--------------------|--------------------|--------------|
| <b>Getreideprodukte</b>                                                               | mehrmals täglich | täglich | mehrmals pro Woche | etwa 1 x pro Woche | mehrmals pro Monat | seltener/nie |
| Brot                                                                                  |                  |         |                    |                    |                    |              |
| Müsli                                                                                 |                  |         |                    |                    |                    |              |
| Vollkornprodukte                                                                      |                  |         |                    |                    |                    |              |
| Kartoffeln, Reis, Nudeln                                                              |                  |         |                    |                    |                    |              |
| <b>Milch und Milchprodukte</b>                                                        | mehrmals täglich | täglich | mehrmals pro Woche | etwa 1 x pro Woche | mehrmals pro Monat | seltener/nie |
| Käsesorten mind. 45% Fett i. Tr.                                                      |                  |         |                    |                    |                    |              |
| fettarme Käsesorten mit weniger als 45% Fett i. Tr.                                   |                  |         |                    |                    |                    |              |
| Milch, Topfen, Joghurt o.ä. mit 3,5% Fett                                             |                  |         |                    |                    |                    |              |
| Milch, Topfen, Joghurt o.ä. mit 1,5%Fett                                              |                  |         |                    |                    |                    |              |
| Sauerrahm, Obers, Creme fraîche                                                       |                  |         |                    |                    |                    |              |
| <b>Fleisch- und Fischprodukte</b>                                                     | mehrmals täglich | täglich | mehrmals pro Woche | etwa 1 x pro Woche | mehrmals pro Monat | seltener/nie |
| Fleisch                                                                               |                  |         |                    |                    |                    |              |
| Fettreiche Wurstsorten (z.B. Leberstreichwurst, Salami, Bergsteiger, Mortadella, ...) |                  |         |                    |                    |                    |              |
| Fettarme Wurstsorten (z.B. Putenwurst, Schinken, Krakauer,...)                        |                  |         |                    |                    |                    |              |
| Fisch                                                                                 |                  |         |                    |                    |                    |              |
| Fischkonserven                                                                        |                  |         |                    |                    |                    |              |
| <b>Obst und Gemüse</b>                                                                | mehrmals täglich | täglich | mehrmals pro Woche | etwa 1 x pro Woche | mehrmals pro Monat | seltener/nie |
| Gemüse und Salat                                                                      |                  |         |                    |                    |                    |              |
| Obst                                                                                  |                  |         |                    |                    |                    |              |

| <b>Fette</b>                                                                             | mehrmals<br>täglich | täglich | mehrmals<br>pro<br>Woche | etwa<br>1 x pro<br>Woche | mehrmals<br>pro<br>Monat | seltener/<br>nie |
|------------------------------------------------------------------------------------------|---------------------|---------|--------------------------|--------------------------|--------------------------|------------------|
| Butter, Margarine                                                                        |                     |         |                          |                          |                          |                  |
| Halbfettbutter oder -margarine                                                           |                     |         |                          |                          |                          |                  |
| Öle                                                                                      |                     |         |                          |                          |                          |                  |
| Schmalz                                                                                  |                     |         |                          |                          |                          |                  |
| <b>Extras</b>                                                                            | mehrmals<br>täglich | täglich | mehrmals<br>pro<br>Woche | etwa<br>1 x pro<br>Woche | mehrmals<br>pro<br>Monat | seltener/<br>nie |
| Süßigkeiten, Schokolade                                                                  |                     |         |                          |                          |                          |                  |
| Kuchen, Kekse, Torten                                                                    |                     |         |                          |                          |                          |                  |
| Eis, Pudding und süße Speisen                                                            |                     |         |                          |                          |                          |                  |
| In Fett gebackene Speisen<br>(Wiener Schnitzel, Pommes<br>frites,...)                    |                     |         |                          |                          |                          |                  |
| Chips, Erdnüsse, Knabbereien                                                             |                     |         |                          |                          |                          |                  |
| <b>Getränke</b>                                                                          | mehrmals<br>täglich | täglich | mehrmals<br>pro<br>Woche | etwa<br>1 x pro<br>Woche | mehrmals<br>pro<br>Monat | seltener/<br>nie |
| Mineralwasser, verdünnte<br>Obstsäfte, Wasser, Tee                                       |                     |         |                          |                          |                          |                  |
| Limonaden, Cola                                                                          |                     |         |                          |                          |                          |                  |
| Limonaden oder Cola mit<br>Süßstoff                                                      |                     |         |                          |                          |                          |                  |
| Obst- und Gemüsesäfte<br>unverdünnt                                                      |                     |         |                          |                          |                          |                  |
| Kakao, Milch, Milchshakes                                                                |                     |         |                          |                          |                          |                  |
| Kaffee                                                                                   |                     |         |                          |                          |                          |                  |
| Bier, Wein, sonstige<br>alkoholische Getränke                                            |                     |         |                          |                          |                          |                  |
| Energiedrinks                                                                            |                     |         |                          |                          |                          |                  |
| <b>Sojaprodukte</b>                                                                      | mehrmals<br>täglich | täglich | mehrmals<br>pro<br>Woche | etwa<br>1 x pro<br>Woche | mehrmals<br>pro<br>Monat | seltener/<br>nie |
| Sojamehl, Sojabohnen                                                                     |                     |         |                          |                          |                          |                  |
| Tofu, Tempeh, Miso, Natto,<br>Sojasprossen                                               |                     |         |                          |                          |                          |                  |
| Fleischersatzprodukte mit Soja<br>(Sojaburger, Sojawurstchen etc.)                       |                     |         |                          |                          |                          |                  |
| Milchersatzprodukte mit Soja<br>(Sojamilch, Drinks, Joghurt,<br>Dessert, Käse, Eis etc.) |                     |         |                          |                          |                          |                  |
| Nahrungsergänzungsmittel mit<br>Soja oder Isoflavonen                                    |                     |         |                          |                          |                          |                  |
| Andere:                                                                                  |                     |         |                          |                          |                          |                  |

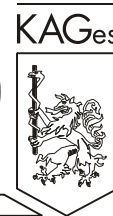

# Food Frequency Questionnaire

StudyID

PatientID

Date:

| How often do you consume the following foods and beverages? |                      |       |                       |                   |                        |                   |
|-------------------------------------------------------------|----------------------|-------|-----------------------|-------------------|------------------------|-------------------|
| Grains                                                      | Multiple times a day | Daily | Multiple times a week | About once a week | Multiple times a month | Less often/ never |
| Bread                                                       |                      |       |                       |                   |                        |                   |
| Muesli                                                      |                      |       |                       |                   |                        |                   |
| Whole wheat products                                        |                      |       |                       |                   |                        |                   |
| Potatoes, rice, pasta                                       |                      |       |                       |                   |                        |                   |
| Milk and Dairy                                              | Multiple times a day | Daily | Multiple times a week | About once a week | Multiple times a month | Less often/ never |
| Cheese, min. 45% fat content                                |                      |       |                       |                   |                        |                   |
| Low-fat cheese, <45% fat content                            |                      |       |                       |                   |                        |                   |
| Milk, curd, yoghurt, or similar, 3,5% Fett                  |                      |       |                       |                   |                        |                   |
| Milk, curd, yoghurt, or similar, 1,5%Fett                   |                      |       |                       |                   |                        |                   |
| Sour cream, cream, creme fraîche                            |                      |       |                       |                   |                        |                   |
| Meat and Fish                                               | Multiple times a day | Daily | Multiple times a week | About once a week | Multiple times a month | Less often/ never |
| Meat                                                        |                      |       |                       |                   |                        |                   |
| Fatty cold cuts (e.g. liverwurst, salami, mortadella, ...)  |                      |       |                       |                   |                        |                   |
| Low-fat cold cuts (e.g. turkey, ham,...)                    |                      |       |                       |                   |                        |                   |
| Fish                                                        |                      |       |                       |                   |                        |                   |
| Canned fish                                                 |                      |       |                       |                   |                        |                   |
| Fruits and Vegetables                                       | Multiple times a day | Daily | Multiple times a week | About once a week | Multiple times a month | Less often/ never |
| Vegetables and salad                                        |                      |       |                       |                   |                        |                   |
| Fruits                                                      |                      |       |                       |                   |                        |                   |
| Fats                                                        | Multiple times a     | Daily | Multiple times a      | About once a      | Multiple times a       | Less often/       |

|                                                                                          | day                  |       | week                  | week              | month                  | never             |
|------------------------------------------------------------------------------------------|----------------------|-------|-----------------------|-------------------|------------------------|-------------------|
| Butter, margarine                                                                        |                      |       |                       |                   |                        |                   |
| Low-fat butter or margarine                                                              |                      |       |                       |                   |                        |                   |
| Oils                                                                                     |                      |       |                       |                   |                        |                   |
| Lard                                                                                     |                      |       |                       |                   |                        |                   |
| <b>Extras</b>                                                                            | Multiple times a day | Daily | Multiple times a week | About once a week | Multiple times a month | Less often/ never |
| Sweets, chocolate                                                                        |                      |       |                       |                   |                        |                   |
| Cake, cookies                                                                            |                      |       |                       |                   |                        |                   |
| Ice cream, pudding                                                                       |                      |       |                       |                   |                        |                   |
| Deep-fried foods (Wiener Schnitzel, french fries,....)                                   |                      |       |                       |                   |                        |                   |
| Chips, peanuts, salty snacks                                                             |                      |       |                       |                   |                        |                   |
| <b>Drinks</b>                                                                            | Multiple times a day | Daily | Multiple times a week | About once a week | Multiple times a month | Less often/ never |
| Mineral water, diluted fruit juices, water, tea                                          |                      |       |                       |                   |                        |                   |
| Lemonade, soda                                                                           |                      |       |                       |                   |                        |                   |
| Sugar-free lemonade or soda                                                              |                      |       |                       |                   |                        |                   |
| Undiluted fruit and vegetable juices                                                     |                      |       |                       |                   |                        |                   |
| Cocoa, milk, milkshakes                                                                  |                      |       |                       |                   |                        |                   |
| Coffee                                                                                   |                      |       |                       |                   |                        |                   |
| Beer, wine, other alcoholic beverages                                                    |                      |       |                       |                   |                        |                   |
| Energy drinks                                                                            |                      |       |                       |                   |                        |                   |
| <b>Soy Products</b>                                                                      | Multiple times a day | Daily | Multiple times a week | About once a week | Multiple times a month | Less often/ never |
| Soy meal, soy beans                                                                      |                      |       |                       |                   |                        |                   |
| Tofu, tempeh, miso, natto, soy sprouts                                                   |                      |       |                       |                   |                        |                   |
| Meat replacements with soy (soy burger, soy sausage etc.)                                |                      |       |                       |                   |                        |                   |
| Dairy replacements with soy (soy milk, drinks, yoghurt, dessert, cheese, ice cream etc.) |                      |       |                       |                   |                        |                   |
| Supplements containing soy or isoflavones                                                |                      |       |                       |                   |                        |                   |
| Others:                                                                                  |                      |       |                       |                   |                        |                   |
