# Supplementary material for: Alterations in Gut Microbiome Composition and Barrier Function Are Associated with Reproductive and Metabolic Defects in Women with Polycystic Ovary Syndrome (PCOS): A Pilot Study
Source: PLoS One. 2017 Jan 3;12(1):e0168390. doi: 10.1371/journal.pone.0168390 (PMC5207627; doi:10.1371/journal.pone.0168390)
Supplement: S3 File — (XLSX) [file pone.0168390.s007.xlsx]

## Sheet: Raw data
Screening#	PCOS	Age	PCOsono	FGScore	CyclePhase	TotalPointsFFQnowater	GrainsFFQ	CarbsFFQ	DairyFFQ	MeatFishFFQ	ProteinFFQ	FruitVegFFQ	FatsFFQ	ExtrasFFQ	LiquidsFFQ	SoyFFQ	DietGroup	LCT	BMI	WHR	SHBG	FSH	LH	SIAMH	SIGlucosefasting	SIGlucose30min	SIGlucose60min	SIGlucose2h	SIInsulinfasting	SIInsulin30min	SIInsulin60min	SIInsulin2h	SITChol	SIHDL	SITG	E2	E1	Testo	Andro	DHT	DHEA	DHEAS	SIhsCRP	Calprotectinstool	Zonulinserum	Zonulinstool	sCD14	LBP	DAO
1	0	47.3	0	3	2	107	17	31	23	6	29	14	14	8	25	0	2	2	32.1466	0.91453	21.6	4.04	0.37		5.936	9.8	9.184	4.648	243.945	873.615	1301.04	264.795	4.758	1.43	1.023	246.939	201.938	0.279	0.934		4.536	2.67	1.54238	8.9898	26.928	143.601	1414.63	34.5357	22.925
3	0	26.1	0	0	2	83.5	23	37	15	0	15	14	9.5	6.5	8.5	7	1	2	26.2596	0.74359	61.2	10.2	11.9	26.9892	4.368	4.816	3.36	4.592	59.77	234.91	189.04	131.355	3.51	2.132	0.583	478.197	399.658	1.454	2.862	0.357	20.078	6.41	0.780242	17.1221	36.2931	79.0982	1365.93	28.4043	8.87
4	0	28.8	0	1	1	93.5	18	46	9.5	4	13.5	28	7	10.5	16.5	0	1	2	18.3145	0.752688	70.5	9.81	7.46	26.5608	4.76	10.584	5.768	2.856	127.88	957.015	911.84	244.64	3.848	2.392	0.429	755.513	304.703	1.301	5.078	1.374	50.864	6.85	0.145801	17.6185	32.0658	65.0749	1168.74	29.0666	9.075
5	0	36.9	0	3	1	52.5	22	26	7	5	12	4	9	3.5	1.5	0.5	2	3	20.4152	0.858696	77.5	14.5	4.01	42.3402	4.256	4.872	3.528	4.424	35.445	394.76	123.71	100.775	4.108	2.132	0.385	119.508	78.377	0.703	1.581	0.343	7.825			46.4454	17.5666	50.7585	1271.64	30.2335	10.976
7	0	42.4	0	1	2	70	18	39	3	0.5	3.5	21	4	8	14.5	1	1	2	23.3067	0.8	59.2	11	3.07	12.4236	4.368	5.432	2.968	3.752	36.835	15.29	59.77	41.7	5.252	2.548	0.495	227.871	126.216	0.668	1.573	0.309	10.014	3.23	0.613947	25.1305	26.7105	117.66	1125.82	27.8718	7.271
11	0	46.3	0	3		84.5	16	44	7	3.5	10.5	28	9	2.5	18	0.5	1	2	20.7008	0.747475	95	4.63	1.69	7.854	4.872	7.056	5.544	5.432	29.885	122.32	23.63	56.295	4.966	1.976	0.473	296.454	149.594	0.523	1.134	0.223	13.807	2.88	0.384137	8.86372	23.6585	59.1161	1609	25.6552	10.0295
12	0	31.8	0	0	1	90.5	30	44	8	5	13	14	9	2	14.5	8	1	2	26.4915	0.745192	111.5	12.5	4.47	15.5652	4.928	5.768	3.304	3.416	82.705	357.23	129.27	118.845	4.576	2.054	0.726	154.232	107.777	1.081	2.937	0.581	13.688	3.35	0.417606	37.9286	21.2326	86.2729	1114.83	33.5683	11.6265
14	0	42.1	0	1	1	52	11	25	11	4.5	15.5	14	1.5	8.5	1.5	0	2	1	21.6333	0.784314	116.6	7.95	2.87	7.2828	4.648	6.104	5.6	4.144	27.8	68.805	191.125	166.8	4.758	1.82	0.605	269.57	152.997	0.527	1	0.12	5.806	2	0.357655	202.344	26.3219	54.4312	1624.79	26.515	10.6675
15	0	31.3	0	0	2	58.5	12	26	6.5	6	12.5	14	8	3.5	8.5	0	2	2	22.1453	0.808081	72.4	21	32.5	31.416	4.368	5.096	3.248	3.976	79.925	501.79	141.085	375.995	4.394	1.898	0.792	487.901	393.28	1.11	2.647	0.719	19.461	5.52	0.348815	230.743	33.6678	86.2729	1369.78	31.4223	18.0725
17	0	36.7	0	0	2	55.5	24	33	0	0.5	0.5	9	15	3	3	1	1	2	22.2063	0.861702	95.6	8.76		4.998	4.648	9.184	6.272	6.104	36.14	272.44	316.225	74.365	4.264	1.69	0.407	540.932	301.319	1.475	4.114	0.574	45.831	8	0.503642	86.517	27.3662	112.412	1887	14.11	3.72
18	0	27.5	0	4	2	66	23.5	37.5	0	10	10	14	1	3	14.5	0	1	3	24.1588	0.796117	70.2	5.16	5.35	11.7096	3.92	5.096	3.864	3.864	23.63	55.6	127.185	73.67	4.654	2.47	0.638	596.627	226.017	0.727	2.003	0.206	12.197	3.07	0.143959	27.9346	31.0455	115.5	2341	12.33	4.66
20	0	31.8	0	4	2	70.5	11	25	16	4	20	14	2	5	16.5	2	2	2	22.3214	0.802083	57.3	14.6	23.1	13.923	4.984	9.576	6.832	5.096	105.64	818.015	809.675	277.305	4.524	2.08	0.583	1034	378.087	1.182	4.674	0.445	16.91	3.29	0.486109	27.2046	22.7023	53.7801	2735	6.95	9.21
21	0	34.8	0	1	2	90	16.5	37.5	11.5	5.5	17	21	9	9.5	16	1	1	1	26.8136	0.8125	118.7	12.6	14.9	10.6386	4.984	8.4	4.48	4.592	39.615	462.87	410.745	75.06	4.186	2.054	0.704	419.865	482.071	0.88	1.815	0.242	11.417	1.91	2.1428	34.0985	24.6786	61.6397	1222.01	30.6876	6.361
23	0	40.9	0	1	1	55	10	24	8.5	6	14.5	14	4	4	8.5	0	2	2	21.5139	0.738318	71.9	16.4	16.6		4.424	6.328	4.368	4.816	33.36	209.89	146.645	184.87	5.538	2.574	0.616	803.861	328.199	0.401	1.601	0.122	7.414	4.49	0.514158	103.794	23.0583	296.139	1174.89	20.7678	2.2855
25	0	27.8	0	4	2	63.5	10	19	9.5	3.5	13	9	9	7.5	15	0	2	1	20.4783	0.814433	119.2	4.5	7.99	44.625	4.2	6.832	5.376	4.256	47.26	510.825	315.53	93.825	4.966	1.69	0.737	397.175	194.992	0.965	3.194	0.464	33.233	3.12	0.456275		19.8876		1398.19	28.5111	5.7085
29	0	26.9	0	0	2	67	13	21	11	9	20	8	7	10	9	0	2	2	24.093	0.811321	80.4	9.61	12.9	32.5584	4.648	5.488	4.2	3.864	129.965	462.175	341.245	151.51	4.576	1.742	0.561	444.91	282.585	1.117	2.516	0.231	11.705	2.5	0.908386	37.9286	32.3617	106.754	1450.44	24.8852	19.422
31	0	26.6	0	0	2	65.5	12	17	7	12	19	5	5	12	12.5	0	2	3	18.9866	0.808989	95.1	2.73	5.51	64.6884	4.368	9.072	7.28	6.496	31.275	46.565	47.26	127.185	3.302	2.002	0.352	426.633	265.727	1.357	3.21	0.463	20.503	7.26	1.05832	115.035	29.2583	98.499	1023.02	23.7291	4.2655
32	0	26.5	0	0		51.5	5	12	2	11	13	7	4	5	16.5	1	2	3	22.1453	0.735294	78.5	4.36	5.81	43.4826	4.648	8.848	7.728	5.488	25.02	452.445	155.68	295.375	3.796	1.638	0.462	418.936	222.43	1.112	3.656	0.33	14.761	3.39	2.17707	20.8337	28.0771	61.1941	1349.12	33.4364	4.158
40	0	26.2	0	0	2	70	13	22	9	7	16	9	7	6	18.5	0.5	2	2	24.0882	0.805556	88.8	1.73	3.56	30.6306	4.256	5.096	4.144	4.256	84.095	13.205	11.12	31.97	4.81	1.794	0.803	773.158	352.552	1.156	2.43	0.347	22.22	7.1	1.06503	33.1365	8.85208	52.3501	1523.25	34.5447	7.4555
44	0	37.5	0	10	2	83	23	37	15	3	18	14	14.5	2.5	9	2	2	3	26.7698	0.868687	64.7	4.39	6.15	34.1292	3.808	5.096	4.424	3.808	43.09	38.92	42.395	138.305	4.498	1.69	0.682	517.77	365.088	1.429	2.61	0.152	1.124	2.67	0.233083	35.1201	31.6031	119.169	1664.68	30.3504	30.5385
8	1	30	1	2		50.5	5	21	2	1	3	16	7	3	15.5	1	1	2	20.1995	0.712871	64	7.98		27.2748	4.536	6.048	3.416	3.528	22.935	190.43	381.555	27.105	5.122	2.99	0.352	84.634	121.753	1.065	1.911	0.522	24.805	3.94	0.234817	10.8775	34.3874	328.639	1389.66	27.9332	11.373
9	1	25.5	1	15		77	10.5	31.5	11	4.5	15.5	21	3	8	19	0	1	2	20.5191	0.75	5.1	13.3	15.2		4.424	5.768	3.584	3.416	64.635	143.865	134.83	8.34	4.55	2.054	0.638	209.491	229.649	1.842	5.308	0.793	17.739	3.65	0.350583	31.8108	18.6213	98.3792	898.278	27.8748	16.096
10	1	22.6	1	1		47	12	15	1	1	2	3	9	9.5	8.5	3	1	2	19.4874	0.79798	8.9	8.68	9.32	71.4	4.312	6.384	4.088	3.808	45.87	483.025	198.075	172.36	3.692	1.768	0.66	177.618	148.389	1.816	4.615	0.933	30.611	6.28	1.08665	7.3485	22.9789	131.45	1970.99	29.5847	13.324
19	1	31.6	1	6		85.5	12	26	11	7	18	14	14	6.5	18.5	2.5	2	2	33.3061	0.834646	36	5.11	15.9	45.5532	5.096	9.128	7.392	4.816	125.795	568.51	742.26	267.575	5.642	2.028	0.913	258.72	294.426	1.23	5.537	0.532	14.004	3.67	5.46112	36.7347	39.6008	90.2137	1575	19.44
22	1	21.6	1	0		84.5	21.5	42.5	4.5	5.5	10	21	11	4	17	0	1	1	36.9608	0.945455	30.6	4.63	5.18		4.48	6.328	8.624	6.44	152.205	771.45	265.49	1245.44	4.134		0.715	105.223	158.318	0.683	2.069	0.172	11.659	2.94	13.182	5.19479	37.9451	40.8036	1474.62	48.5788	30.177
24	1	42	1	1		82.5	13	27	5	5.5	10.5	14	15	10.5	17	2.5	2	3	33.9624	0.829268	54.4	7.95	5.61	44.0538	4.872	8.008	6.44	4.76	89.655	781.875	337.075	63.245	4.316	1.794	0.55	90.325	137.884	0.965	2.492	0.302	20.576	5.81	1.18968	5.57547	36.3472	27.9681	1382.68	29.9959	10.2025
26	1	35.7	1	9		106.5	19	47	9.5	8	17.5	28	21	3.5	17.5	0	1	2	35.4191	0.813953	20.5	5.68	6.89	37.3422	4.76	6.44	5.432	5.768	113.285	473.295	387.115	445.495	5.252	1.222	1.397	152.171	229.596	0.996	2.439	0.218	9.715	2.2	4.43818	33.9783	27.2782	154.719	1415.46	37.8801	10.6015
28	1	24.5	1	6	2	70	12	20	13	9	22	8	8	14	6	0	2	1	24.1588	0.8	100.1	9.35	18.5	107.814	5.04	6.048	5.208	4.368	71.585	60.465	88.265	7.645	5.408	1.482	1.133	358.668	276.248	2.481	6.866	0.854	60.452	5.42	0.531677	62.7586	19.8876	187.834	1416.82	28.9763	19.152
30	1	36	1	7		49	8	17	0	6	6	9	0	0	21	5	1	2	27.4145	0.869565	66.8	7.49	11.5		4.592	7.448	5.152	3.92	45.175	13.9	1080.73	18.07	5.72	1.144	0.737	231.618	314.532	2.512	6.504	1.23	24.732	4.05	4.72867	18.3623	35.7021	65.3689	1244.11	34.6854	5.803
33	1	29.7	1	15	1	46	11	21	2	2	4	10	6	5	10	0	1	2	20.0796	0.849462	87.8	10.7	9.57	21.2058	5.768	7.504	4.592	4.816	109.115	426.035	230.045	150.815	4.68	1.56	0.935	137.459	120.634	0.925	2.655	0.872	28.742	4.62	0.267069	14.7578	35.2772	97.2889	1552.01	28.6463	9.661
34	1	30.7	1	14	2	69.5	9	15	9	8	17	6	10	7	19	1.5	2	3	26.5338	0.81982	47	3.59	7.15	17.2788	4.928	8.008	3.36	4.592	46.565	1115.48	335.685	202.94	4.004	1.664	0.473	411.713	234.586	1.013	3.434	0.37	49.61	6.32	0.696186	35.8974	40.127	51.0451	1484.47	24.9763	21.909
36	1	29.7	1	2		67.5	14	22	7	3	10	8	8	10	8	9.5	2	2	20.4382	0.767677	36.4	6.05	6.54	64.617	5.264	6.776	4.928	3.304	76.45	396.845	379.47	90.35	4.446	1.794	0.737	269.429	151.759	0.879	6.007	0.255	7.968	2.03		139.685	32.9597	70.3737	1447.96	32.0753	9.1415
37	1	27.9	1	10	2	69	15	21	9	9	18	6	6	8	16	0	2	2	19.7133	0.707071	83.8	12.9	47.6	56.9772	4.424	5.152	4.032	4.648	83.4	303.02	307.885	267.575	3.354	1.43	0.627	1362.56	668.304	1.703	4.113	1.06	21.815	5.88	0.696186	7.47493	16.3028	71.1365	1451.39	33.457	4.872
38	1	28.1	1	4	1	70.5	14	22	14	7	21	8	8	12	7	0.5	2	2	20.9366	0.760417	43	7.41	7.04	88.536	4.816	4.816	4.032	4.816	63.245	308.58	86.18	153.595	5.174	1.586	0.825	96.366	150.099	1.393	4.232	0.805	24.55	9.53	0.191485	22.3109	24.6786	153.365	1209.84	29.0887	13.8855
39	1	23.5	1	0		59.5	14	21	9	11	20	7	7	8	3	0.5	2	1	24.3911	0.714286	72.7	6.35	11.5		4.536	7.224	6.776	5.992	70.195	404.49	369.74	373.215	5.018	2.678	0.594	158.581	145.797	0.99	2.594	0.469	18.59	4.85	0.799781	13.134	26.8844	56.7336	1044.1	29.253	13.96
41	1	22.7	0	9		39	6	13.5	3	8	11	7.5	3.5	8.5	2.5	0	2	2	39.8864	0.84058	22.9	8.19	14.9	73.542	4.984	6.552	6.608	5.88	97.995	323.175	663.03	461.48	4.732	1.794	0.627	137.202	198.194	1.853	5.567	0.1	32.901	4.91	8.69458	51.236	45.9699	161.043	1248.17	36.1706	19.6495
42	1	27.4	1	6		105.5	23	44	17	6	23	21	15	4.5	16	3	2	2	31.1419	0.898305	27.6	3.04	6.52	84.966	4.984	8.008	5.824	5.376	184.175	1920.29	1152.31	409.355	3.718	1.378	1.078	308.406	292.986	1.317	3.559	0.358	13.503	3.8	0.95384	183.492	42.7604	110.646	1443.23	24.621	4.0595
43	1	27.5	1	2		18.5	4.5	8.5	0.5	3.5	4	4	1	3	2	0	1	2	25.3902	0.841584	71.9	3.28	9.25	92.1774	4.2	7	6.664	6.272	108.42	425.34	565.035	910.45	4.394	1.638	0.759	978.596	454.364	1.427	4.202	0.459	17.87	3.66	0.240588	21.5219	40.1237	245.946	1744.1	35.1332	14.341
45	1	20.8		12		60.5	6.5	20.5	11	6.5	17.5	14	4.5	5	12	1	2	3	30.3871	0.817391	11.6	7.42	23.6	119.309	4.704	8.064	7.616	5.32	152.9	1107.14	1419.89	1216.25	3.458	1.17	0.803	167.74	192.451	1.735	6.566	0.301	46.234	20.1	0.485333	35.6467	34.7557	321.671	1153.23	28.7029	10.753
46	1	23.5	1	10		75.5	7	35	12.5	6	18.5	28	9	3.5	9	0.5	2	2	30.0781	0.824324	31.6	5.6	6.6	87.2508	5.152	6.832	4.368	4.704	97.995	309.275	215.45	103.555	5.148	1.508	1.122	78.077	158.331	1.243	3.179	0.207	20.966	5.64	1.27009	14.4065	30.3255	150.709	1719.52	32.1618	7.34
47	1	28.2	1	15	1	89	23	31	13	6.5	19.5	8	11	6.5	20	1	2	2	35.2653	0.919355	31	7.7	2.86	20.6346	5.04	7.952	7.784	4.872	145.255	407.27	810.37	316.92	4.004	1.144	0.605	110.425	231.775	1.045	3.068	0.349	33.512	7.36	4.31764	27.9336	26.7141	125.993	1388.67	37.0028	13.8615
48	1	24.5	1	4		63	7	28	3.5	2	5.5	21	8	4	17	0.5	1	3	24.0882	0.769231	67.3	8.3	12.1	33.2724	4.144	5.152	4.2	4.144	30.58	348.89	119.54	147.34	4.42	1.924	0.66	473.17	258.022	1.976	4.265	0.727	21.904	5.62	0.514383	8.58954	34.6041	99.6322	1418.94	30.3355	17.045
49	1	25.5	1	11		47	6.5	15.5	8.5	3	11.5	9	14	3	3	0	2	3	19.1571	0.79798	25.8	5.43	22.9	153.439	4.2	8.232	7.336	4.816	48.65	511.52	488.585	1170.38	4.914	1.69	0.803	133.487	145.87	1.615	6.086	0.417	16.808	3.87	1.67287	108.679	39.8345	351.107	1647.88	29.4136	8.517
50	1	26.6	1	11	2	43.5	8	12	6.5	1.5	8	4	4	4.5	15	0	2	2	22.2063	0.848485	64.6	8.18	9.13	57.6198	4.368	5.096	4.144	4.256	85.485	354.45	362.79	91.045	3.64	1.924	0.77	88.582	148.059	1.353	4.271	1.104	18.167	8.41	0.168842	16.6523	37.1588	159.899	1132.81	31.3784	11.6025
[truncated: 3 more columns]

## Sheet: Variables
Name	Label	Values
Screening#
PCOS		0, no; 1, yes
Age	Age in years at study visit
PCOsono	polycystic ovaries in ultrasound	0, no; 1, yes
FGScore	Ferriman-Gallwey Score
CyclePhase		0, acyclic; 1, proliferative; 2, secretory
TotalPointsFFQnowater
GrainsFFQ
CarbsFFQ
DairyFFQ
MeatFishFFQ
ProteinFFQ
FruitVegFFQ
FatsFFQ
ExtrasFFQ
LiquidsFFQ
SoyFFQ
DietGroup	diet group	1, high carbohydrate; 2, high animal protein
LCT		1, TT; 2, TC; 3, CC
BMI	body mass index
WHR	waist to hip ratio
SHBG	sex hormone binding globulin (nmol/l)
FSH	follicle stimulating hormone (IU/l)
LH	luteinizing hormone (IU/l)
SIAMH	anti-muellerian hormone (pmol/ll)
SIGlucosefasting	glucose 0min (mmol/l)
SIGlucose30min	glucose 30min (mmol/l)
SIGlucose60min	glucose 60min (mmol/l)
SIGlucose2h	glucose 120min (mmol/l)
SIInsulinfasting	insulin 0min (pmol/l)
SIInsulin30min	insulin 30min (pmol/l)
SIInsulin60min	insulin 60min (pmol/l)
SIInsulin2h	insulin 120min (pmol/l)
SITChol	total cholesterol (mmol/l)
SIHDL	HDL-cholesterol (mmol/l)
SITG	triglycerides (mmol/l)
E2	MS-E2 (pmol/l)
E1	MS-E1 (pmol/l)
Testo	MS-Ttesto (nmol/l)
Andro	MS-Andro (nmol/l)
DHT	MS-DHT (nmol/l)
DHEA	MS-DHEA (nmol/l)
DHEAS	MS-DHEAS (µmol/l)
SIhsCRP	hsC-reactive protein (mg/l)
Calprotectinstool	stool calprotectin (µg/g)
Zonulinserum	serum zonulin (ng/ml)
Zonulinstool	stool zonulin (ng/ml)
sCD14	sCD14 (ng/ml)
LBP	LBP (µg/ml)
DAO	DAO (U/ml)
LPS	endotoxin (EUml)
Leuko	Leukocytes (G/l)
Lymphoabs	Lymphocytes abs (G/l)
